# Supplementary material for: The AAA protein Msp1 mediates clearance of excess tail-anchored proteins from the peroxisomal membrane
Source: eLife journal article supplement (doi:10.7554/elife.28507), 2017-09-14
Supplement: supp [file elife-28507-supp-v1.zip]

Archive with 11 entries (11 files):
- elife_poa_e28507_Video_2.mov
- elife_poa_e28507_Figure_6_Figure_Supplement_1.pdf
- elife_poa_e28507_Figure_1_Figure_Supplement_2.pdf
- elife_poa_e28507_Figure_7_Figure_Supplement_1.pdf
- elife_poa_e28507_Figure_5_Figure_Supplement_1.pdf
- elife_poa_e28507_Transparent_Reporting_File.docx
- elife_poa_e28507_Figure_4_Figure_Supplement_1.pdf
- elife_poa_e28507_Figure_3_Figure_Supplement_1.pdf
- elife_poa_e28507_Figure_1_Figure_Supplement_1.pdf
- elife_poa_e28507_Figure_2_Figure_Supplement_1.pdf
- elife_poa_e28507_Video_1.mov
