# Supplementary material for: The AAA protein Msp1 mediates clearance of excess tail-anchored proteins from the peroxisomal membrane
Source: eLife journal article supplement (doi:10.7554/elife.28507), 2017-09-14

**Figure 4 - Figure Supplement 1****A**

|                              | YFP-Pex15 $_{\Delta C30}$<br>- $\beta$ -estradiol | YFP-Pex15 $_{\Delta C30}$<br>+ $\beta$ -estradiol | YFP-Pex15<br>- $\beta$ -estradiol | YFP-Pex15<br>+ $\beta$ -estradiol |
|------------------------------|---------------------------------------------------|---------------------------------------------------|-----------------------------------|-----------------------------------|
| 1-state $k_{\text{decay}}$   | 1.03**                                            | 3.28**                                            | 0.48**                            | 1.72**                            |
| 2-state $k_{\text{decay},1}$ | 1.98**                                            | 3.57**                                            | -400 (n.s.)                       | 3.45**                            |
| 2-state $k_{\text{mat}}$     | 11**                                              | 0.14**                                            | 3500 (n.s.)                       | 0.98*                             |
| 2-state $k_{\text{decay},2}$ | 0.87**                                            | 0.47**                                            | 0.57**                            | 0.87**                            |
| 1-state RSS                  | 0.0034                                            | 0.0082                                            | 0.039                             | 0.99                              |
| 2-state RSS                  | 0.00012                                           | 0.000052                                          | 0.017                             | 0.0098                            |
| Area between fits/hr         | 0.0296                                            | 0.0388                                            | 0.0503                            | 0.293                             |

**B**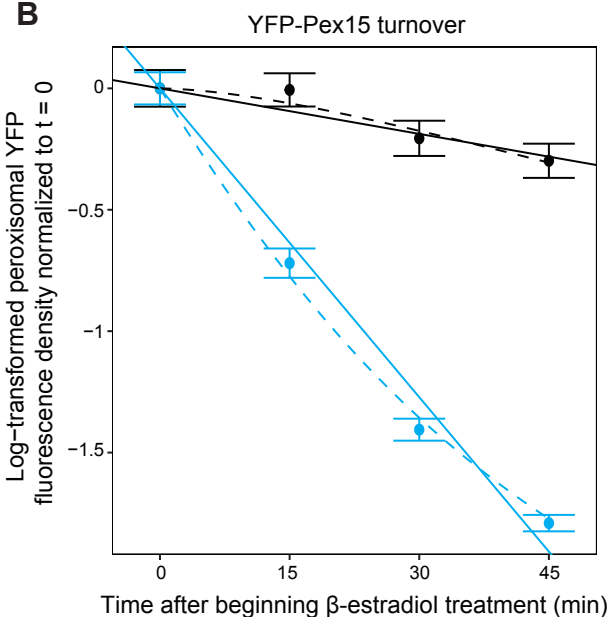

Supplement: supp [file elife-28507-supp-v1.zip › elife_poa_e28507_Figure_4_Figure_Supplement_1.pdf]
