# Supplementary material for: The AAA protein Msp1 mediates clearance of excess tail-anchored proteins from the peroxisomal membrane
Source: eLife journal article supplement (doi:10.7554/elife.28507), 2017-09-14
Supplement: supp [file elife_poa_e28507_Transparent_Reporting_File.docx]

***eLife’s* transparent reporting form**

We encourage authors to provide detailed information *within their submission* to facilitate the interpretation and replication of experiments. If you have any questions, please contact us: [editorial@elifesciences.org](mailto:editorial@elifesciences.org).

**Sample-size estimation**

- You should state whether an appropriate sample size was computed when the study was being designed
- You should state the statistical method of sample size computation and any required assumptions
- If no explicit power analysis was used, you should describe how you decided what sample (replicate) size (number) to use

Please outline where this information can be found within the submission (e.g., page numbers or figure legends), or explain why this information doesn’t apply to your submission:

Sample sizes for quantitative microscopy experiments can be found in the figure legends. Sample size was calculated by manual counting of cells from the source images, which are available on Dryad.

**Replicates**

- You should report how often each experiment was performed
- You should include a definition of biological versus technical replication
- The data obtained should be provided and sufficient information should be provided to indicate the number of independent biological and/or technical replicates
- If you encountered any outliers, you should describe how these were handled
- Criteria for exclusion/inclusion of data should be clearly stated
- High-throughput sequence data should be uploaded before submission, with a private link for reviewers provided (these are available from both GEO and ArrayExpress)

Please outline where this information can be found within the submission (e.g., page numbers or figure legends), or explain why this information doesn’t apply to your submission:

The figure legends indicate how many times experiments were repeated, and a definition of technical replicates is indicated in the Methods section. No outliers were excluded from analyses.

**Statistical reporting**

- Statistical analysis methods should be described and justified
- Raw data should be presented in figures whenever informative to do so (typically when N per group is less than 10)
- For each experiment, you should identify the statistical tests used, exact values of N, definitions of center, methods of multiple test correction, and dispersion and precision measures (e.g., mean, median, SD, SEM, confidence intervals; and, for the major substantive results, a measure of effect size (e.g., Pearson's r, Cohen's d)
- Report exact p-values wherever possible alongside the summary statistics and 95% confidence intervals. These should be reported for all key questions and not only when the p-value is less than 0.05.

Figure legends indicate statistical methods used, with reference to the methods section where relevant. For model fitting to microscopy quantitation (Figure 4), summary statistics for fits are available in tabular form in the figure supplement. As indicated in the Methods section, code used to generate each plot, and therefore each statistical calculation, is also available in the Denic Lab GitHub repository Weir_2017_analysis.

Please outline where this information can be found within the submission (e.g., page numbers or figure legends), or explain why this information doesn’t apply to your submission:

(For large datasets, or papers with a very large number of statistical tests, you may upload a single table file with tests, Ns, etc., with reference to page numbers in the manuscript.)

**Additional data files (“source data”)**

- We encourage you to upload relevant additional data files, such as numerical data that are represented as a graph in a figure, or as a summary table
- Where provided, these should be in the most useful format, and they can be uploaded as “Source data” files linked to a main figure or table
- Include model definition files including the full list of parameters used
- Include code used for data analysis (e.g., R, MatLab)
- Avoid stating that data files are “available upon request”

Please indicate the figures or tables for which source data files have been provided:

All quantitative microscopy experiments. Source microscopy images are available on the Dryad repository associated with this manuscript. Organelle segmentation scripts and usage descriptions can be found on the Denic Lab’s two GitHub repositories associated with this manuscript: One, the segmentation package (pyto_segmenter), and the other, the post-segmentation datasets and analysis scripts (Weir_2017_analysis). Weir_2017_analysis additionally contains the code used to perform Gillespie Simulation for Figure 5.
