# Supplementary figures and images for: The AAA protein Msp1 mediates clearance of excess tail-anchored proteins from the peroxisomal membrane
Source: eLife journal article supplement (doi:10.7554/elife.28507), 2017-09-14

**Figure 6-Figure Supplement 1****C**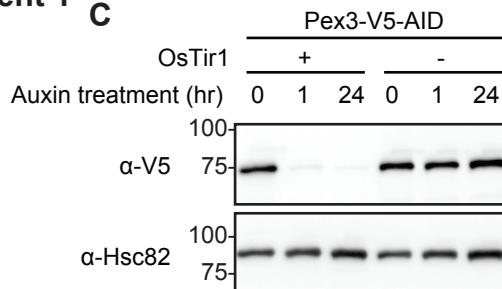**E**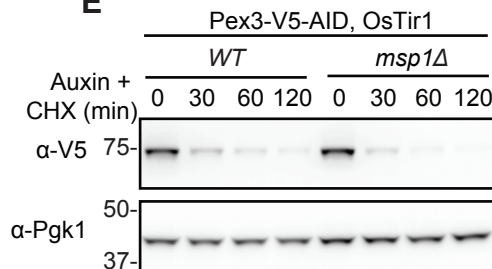**D**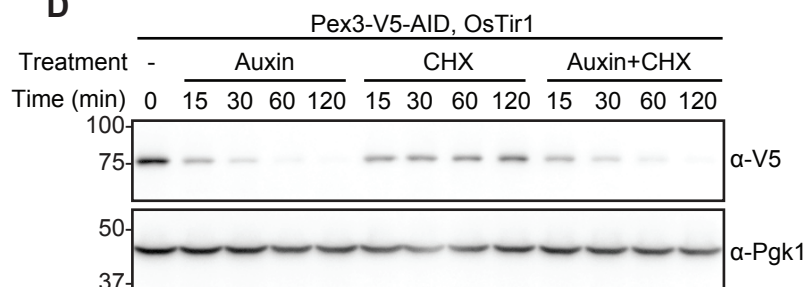**F**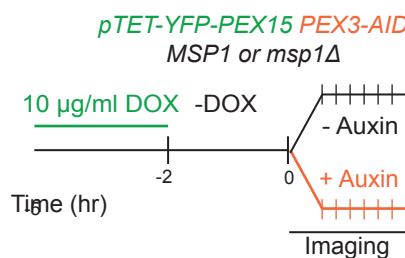**G**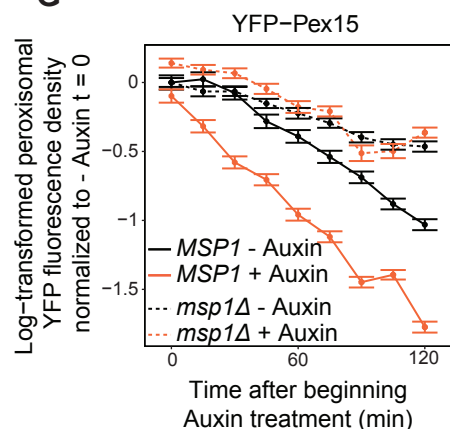**H**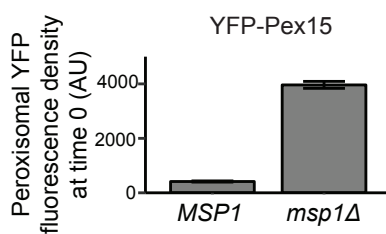**I**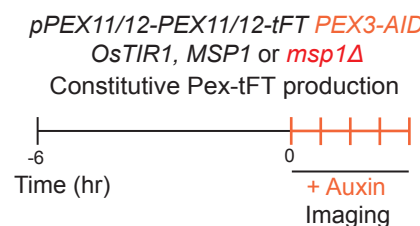**J**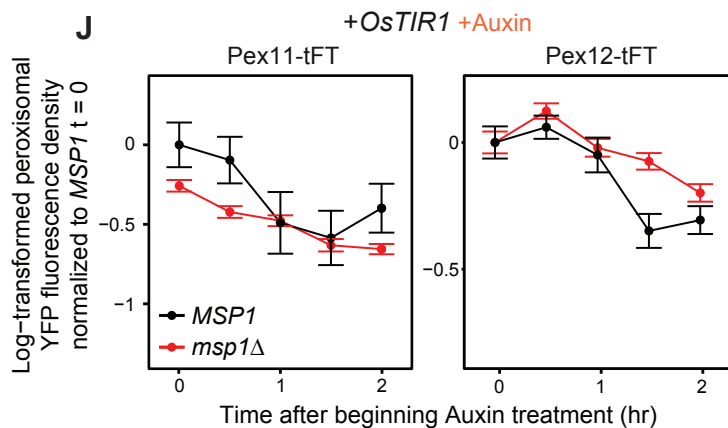**A**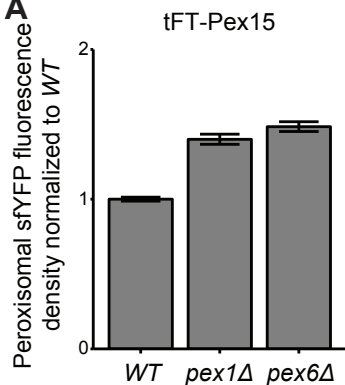**B**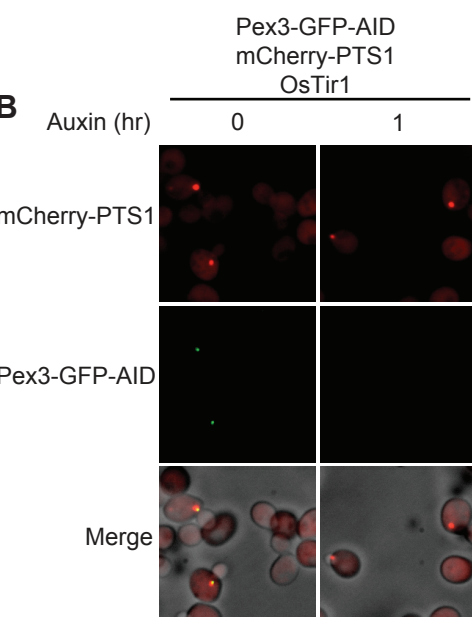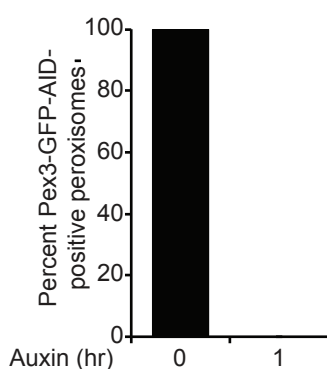

Supplement: supp [file elife-28507-supp-v1.zip › elife_poa_e28507_Figure_6_Figure_Supplement_1.pdf]

# Figure 1-Figure Supplement 2

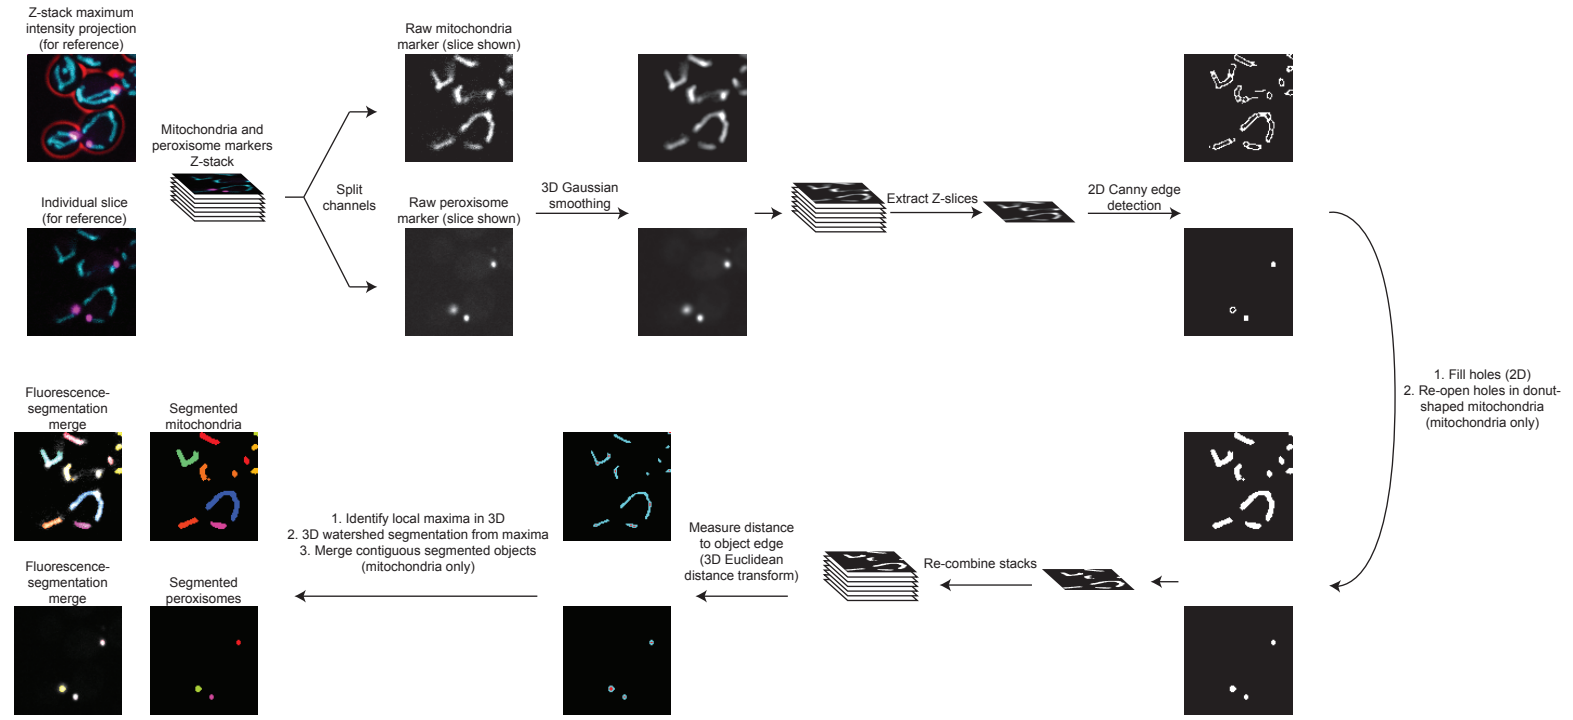

Supplement: supp [file elife-28507-supp-v1.zip › elife_poa_e28507_Figure_1_Figure_Supplement_2.pdf]

**Figure 7 - Figure Supplement 1**

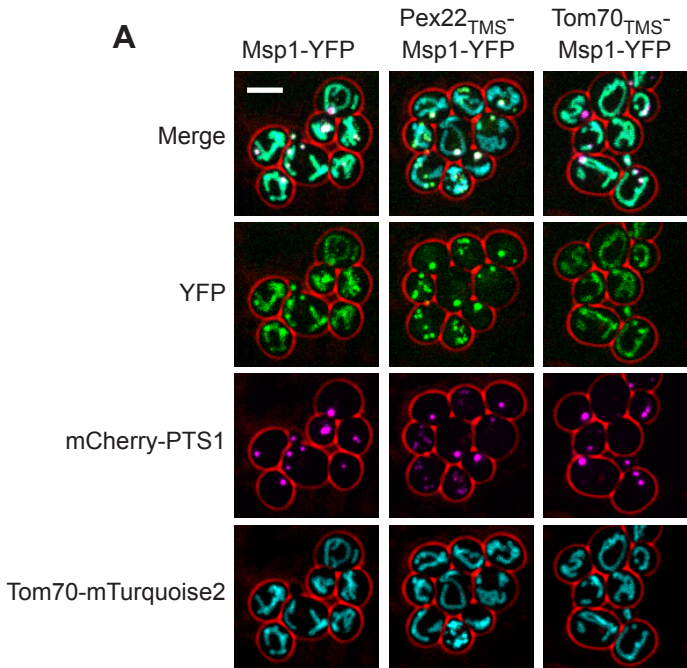

**B**

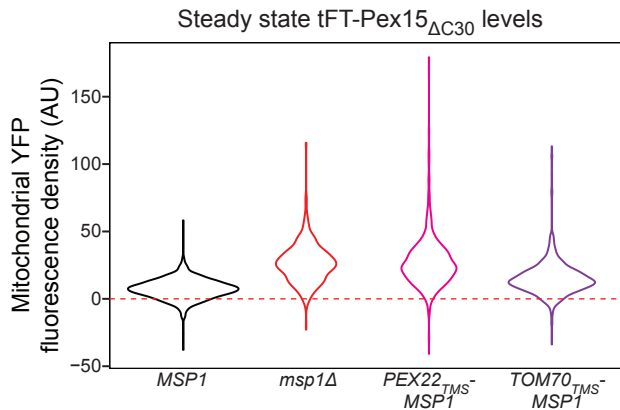

Supplement: supp [file elife-28507-supp-v1.zip › elife_poa_e28507_Figure_7_Figure_Supplement_1.pdf]

# Figure 5-Figure Supplement 1

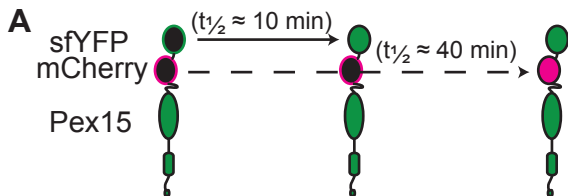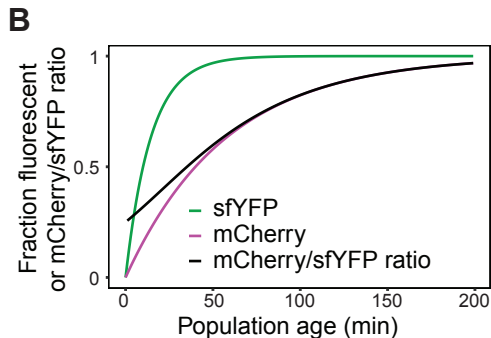

Supplement: supp [file elife-28507-supp-v1.zip › elife_poa_e28507_Figure_5_Figure_Supplement_1.pdf]

## Figure 3 - Figure Supplement 1

**A** *pTET-YFP-PEX15* or *pPEX15-YFP-PEX15*

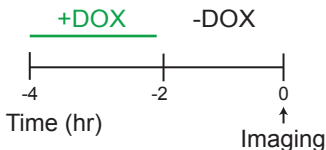

**B**

YFP-Pex15

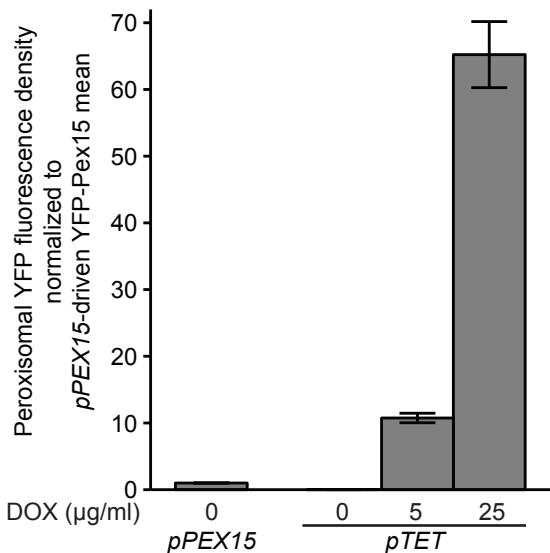

Supplement: supp [file elife-28507-supp-v1.zip › elife_poa_e28507_Figure_3_Figure_Supplement_1.pdf]

**Figure 1-Figure Supplement 1**

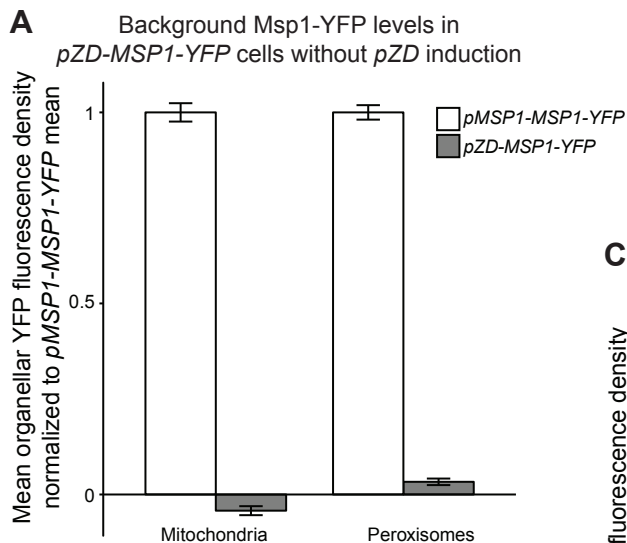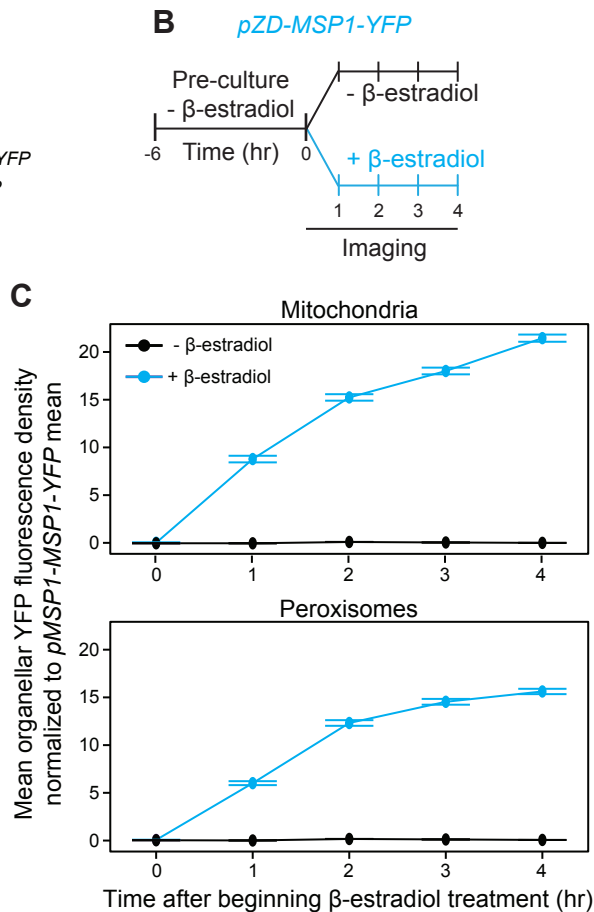

Supplement: supp [file elife-28507-supp-v1.zip › elife_poa_e28507_Figure_1_Figure_Supplement_1.pdf]

# Figure 2-Figure Supplement 1

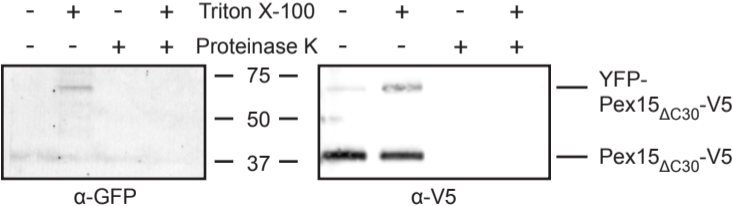

Supplement: supp [file elife-28507-supp-v1.zip › elife_poa_e28507_Figure_2_Figure_Supplement_1.pdf]
